# Supplementary material for: Coriandrum sativum L.—Effect of Multiple Drying Techniques on Volatile and Sensory Profile
Source: MDPI journal article supplement (doi:10.3390/foods10020403), 2021-02-12
Supplement: s1 [file s1]

All analyses were performed on Varian CP-3800/Saturn 2000 apparatus (Varian, Walnut Creek, CA, USA) equipped with a Zebtron ZB-5MSi (30 m × 0.25 mm × 0.25 μm) column (Phenomenex, Torrance, CA, USA).. MS operational conditions were as follows: ion source temperature: 250 °C; scanning mode from 35 to 300 *m/z*.

[https://drive.google.com/drive/folders/1CjkCVn1uZqmy8P--IPCIRFaB3PP\\_gEg1?usp=sharing](https://drive.google.com/drive/folders/1CjkCVn1uZqmy8P--IPCIRFaB3PP_gEg1?usp=sharing)
