# Supplementary material for: Coriandrum sativum L.—Effect of Multiple Drying Techniques on Volatile and Sensory Profile
Source: MDPI journal article supplement (doi:10.3390/foods10020403), 2021-02-12
Supplement: s1 [file s1]

Table 1 Cilantro descriptive sensory analysis lexicon based on Łyczko et al., (2020)

| Descriptor          | Definition                                                                                                             |
|---------------------|------------------------------------------------------------------------------------------------------------------------|
| <b>Aroma</b>        |                                                                                                                        |
| Anise-like          | Sweet, delicate aroma resembling aniseed                                                                               |
| Balsamic            | Balsamic, spicy, slightly lemon-like odour that displays typical incense notes and is somewhat coniferous and resinous |
| Chamomile           | Sweet, apple-like, and herbaceous                                                                                      |
| Earthy              | Generally earthy, mossy, spicy, woody odour with slight phenolic and leather-like notes                                |
| Fresh               | Pleasant, clean and clear aroma, with refreshing warm and sweet notes                                                  |
| Hay-like            | Harsh, mild green, grassy floral, sweet, coumaric odour                                                                |
| Herbaceous          | Pungent–sweet, herbal, rather musty odour with green, medicinal undertones. Reminiscent of wintergreen oil             |
| Nuts                | Nutty roasted, with slight toasted grain note                                                                          |
| Spicy               | Warm–spicy, medicinal, rather dry and almost sharp odour reminiscent of cloves;                                        |
| Sweet               | Sweet, very warm, floral–narcotic odour somewhat reminiscent of almonds                                                |
| Vegetable           | Boiled vegetables like celery, parsley and carrot roots; slightly sulphuric                                            |
| Wet                 | Unpleasant, damp cartoon, humid basement like                                                                          |
| Woody               | Characteristic odour of toasted wood perceived by means of the sense of smell (orthonasal perception)                  |
| <b>Basic Tastes</b> |                                                                                                                        |
| Bitterness          | Fundamental taste factor associated with a caffeine solution                                                           |
| Sourness            | Fundamental taste factor associated with a citric acid solution                                                        |
| Sweetness           | Fundamental taste factor associated with a sucrose solution                                                            |
| Saltiness           | Fundamental taste factor associated with a sodium chloride solution                                                    |
| <b>Flavour</b>      |                                                                                                                        |
| Astringent          | Puckering or drying sensation created in the mouth, throat and/or on tongue                                            |
| Pungent             | Sharp and pricking                                                                                                     |
| Spicy               | Warm–spicy, medicinal, rather dry and almost sharp, reminiscent of cloves                                              |
| Aftertaste          | Sensation intensity perceived just after removing the sample from the mouth or after swallowing the sample             |

Łyczko, J., Masztalerz, K., Lipan, L., Lech, K., Carbonell-Barrachina, Á.A., Szumny, A., 2020. Chemical determinants of dried Thai basil (*O. basilicum* var. *thrysiflora*) aroma quality. *Ind. Crop. Prod.* 155, 112769. <https://doi.org/10.1016/j.indcrop.2020.112769>
