# Supplementary material for: Coriandrum sativum L.—Effect of Multiple Drying Techniques on Volatile and Sensory Profile
Source: MDPI journal article supplement (doi:10.3390/foods10020403), 2021-02-12
Supplement: s1 [file s1]

Both mass spectra was obtained by GC-MS analysis with Varian CP-3800/Saturn 2000 apparatus (Varian, Walnut Creek, CA, USA). MS operational conditions were as follows: ion source temperature: 250 °C; electron impact (EI) ionization at 70 eV; scanning mode from 35 to 300  $m/z$ .

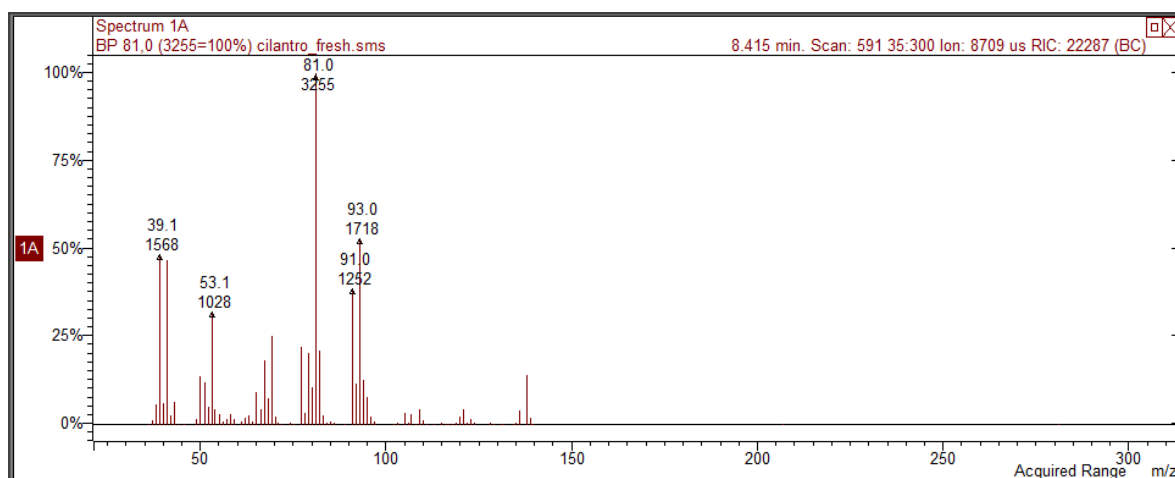

Figure S1 Unknown compound - LRI 992

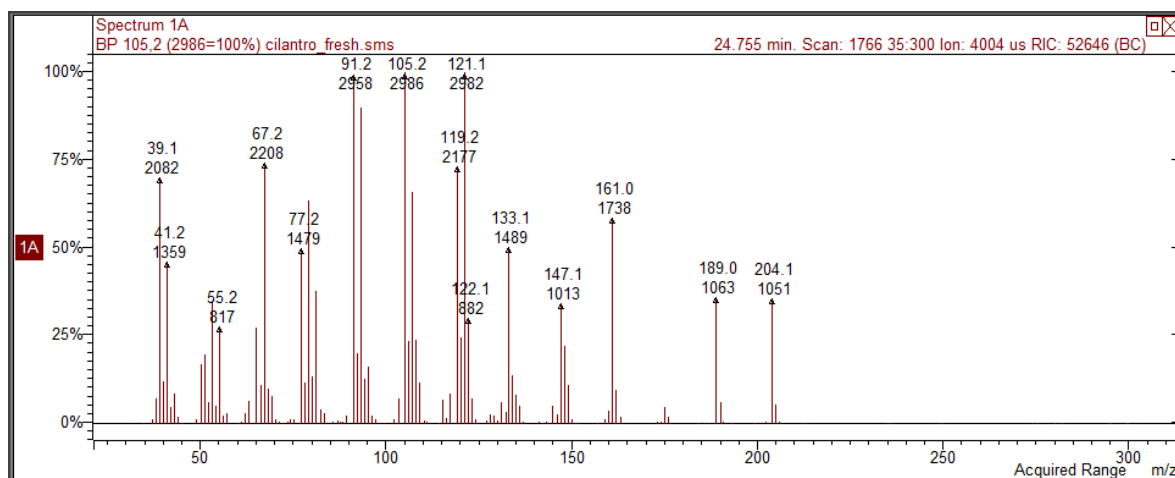

Figure S2 Unknown compound - LRI 1572
